# Supplementary material for: Genome-Wide Identification and Characterization of WRKY Transcription Factors and Their Expression Profile in Loropetalum chinense var. rubrum
Source: MDPI journal article supplement (doi:10.3390/plants12112131), 2023-05-27
Supplement: s1 [file s1]

**Table.S4** Duplication, Ka, Ks, and Ka/Ks for *LcWRKY* gene pairs

| Gene Name       | Gene ID          | Gene Name       | Gene ID          | Ka          | Ks          | Ka/Ks       | Selection pressure  |
|-----------------|------------------|-----------------|------------------|-------------|-------------|-------------|---------------------|
| <i>LcWRKY1</i>  | augustus79532.t1 | <i>LcWRKY4</i>  | augustus61312.t1 | 0.02498318  | 0.034715228 | 0.719660559 | Purifying selection |
| <i>LcWRKY11</i> | augustus67305.t1 | <i>LcWRKY13</i> | augustus31185.t1 | 0.002126907 | 0.016834374 | 0.126343086 | Purifying selection |
| <i>LcWRKY12</i> | augustus31214.t1 | <i>LcWRKY52</i> | augustus66669.t1 | 0.369018092 | 1.024307567 | 0.360261024 | Purifying selection |
| <i>LcWRKY13</i> | augustus31185.t1 | <i>LcWRKY50</i> | augustus44279.t1 | 0.256472607 | 1.63136428  | 0.157213573 | Purifying selection |
| <i>LcWRKY15</i> | augustus75016.t1 | <i>LcWRKY46</i> | augustus66513.t1 | 0.299605622 | 2.352623336 | 0.127349592 | Purifying selection |
| <i>LcWRKY20</i> | augustus53007.t1 | <i>LcWRKY53</i> | augustus17190.t1 | 0.181129467 | 2.048545976 | 0.088418551 | Purifying selection |
| <i>LcWRKY20</i> | augustus53007.t1 | <i>LcWRKY54</i> | augustus44319.t1 | 0.180381186 | 2.102938462 | 0.08577578  | Purifying selection |
| <i>LcWRKY21</i> | augustus35146.t1 | <i>LcWRKY35</i> | augustus63571.t1 | 0.427468958 | 2.261844085 | 0.188991346 | Purifying selection |
| <i>LcWRKY29</i> | augustus78712.t1 | <i>LcWRKY30</i> | augustus79284.t1 | 0.011443324 | 0.019523879 | 0.586119404 | Purifying selection |
| <i>LcWRKY36</i> | augustus43450.t1 | <i>LcWRKY43</i> | augustus64738.t1 | 0.286725314 | 1.478600123 | 0.193916739 | Purifying selection |
| <i>LcWRKY43</i> | augustus64738.t1 | <i>LcWRKY44</i> | augustus03162.t1 | 0.009337604 | 0.032563254 | 0.28675279  | Purifying selection |
| <i>LcWRKY48</i> | augustus34353.t1 | <i>LcWRKY49</i> | augustus63821.t1 | 0.001587722 | 0.010353918 | 0.153345068 | Purifying selection |
| <i>LcWRKY51</i> | augustus55937.t1 | <i>LcWRKY52</i> | augustus66669.t1 | 0.002300321 | 0           | NaN         | NaN                 |
| <i>LcWRKY53</i> | augustus17190.t1 | <i>LcWRKY54</i> | augustus44319.t1 | 0.001201442 | 0.024392394 | 0.04925478  | Purifying selection |
| <i>LcWRKY57</i> | augustus46502.t1 | <i>LcWRKY25</i> | augustus70200.t1 | 0.284293687 | 0.798971022 | 0.355824779 | Purifying selection |
| <i>LcWRKY58</i> | augustus68560.t1 | <i>LcWRKY60</i> | augustus48988.t1 | 0           | 0.014888826 | 0           | Purifying selection |
| <i>LcWRKY6</i>  | augustus43926.t1 | <i>LcWRKY7</i>  | augustus18960.t1 | 0.001267963 | 0           | NaN         | NaN                 |
| <i>LcWRKY6</i>  | augustus43926.t1 | <i>LcWRKY55</i> | augustus13809.t1 | 0.152287012 | 0.912190329 | 0.166946533 | Purifying selection |
| <i>LcWRKY61</i> | augustus49058.t1 | <i>LcWRKY62</i> | augustus39209.t1 | 0.001177394 | 0.016713784 | 0.070444509 | Purifying selection |
| <i>LcWRKY61</i> | augustus49058.t1 | <i>LcWRKY74</i> | augustus24154.t1 | 0.286436779 | 1.430481649 | 0.200237996 | Purifying selection |
| <i>LcWRKY62</i> | augustus39209.t1 | <i>LcWRKY73</i> | augustus62150.t1 | 0.286578631 | 1.396253594 | 0.205248268 | Purifying selection |
| <i>LcWRKY63</i> | augustus61539.t1 | <i>LcWRKY13</i> | augustus31185.t1 | 0.360263976 | 1.57920481  | 0.228129989 | Purifying selection |
| <i>LcWRKY64</i> | augustus39108.t1 | <i>LcWRKY51</i> | augustus55937.t1 | 0.306391217 | 0.973586901 | 0.314703512 | Purifying selection |
| <i>LcWRKY65</i> | augustus38604.t1 | <i>LcWRKY12</i> | augustus31214.t1 | 0.348188556 | 0.928671281 | 0.374931973 | Purifying selection |
| <i>LcWRKY65</i> | augustus38604.t1 | <i>LcWRKY52</i> | augustus66669.t1 | 0.308817177 | 0.973586901 | 0.317195287 | Purifying selection |
| <i>LcWRKY67</i> | augustus16677.t1 | <i>LcWRKY78</i> | augustus37479.t1 | 0.253567279 | 0.938903425 | 0.270067477 | Purifying selection |
| <i>LcWRKY67</i> | augustus16677.t1 | <i>LcWRKY8</i>  | augustus34013.t1 | 0.263201474 | 1.024989758 | 0.256784492 | Purifying selection |
| <i>LcWRKY68</i> | augustus16954.t1 | <i>LcWRKY69</i> | augustus69059.t1 | 0.034587199 | 0.05515315  | 0.627111933 | Purifying selection |
| <i>LcWRKY68</i> | augustus16954.t1 | <i>LcWRKY77</i> | augustus38956.t1 | 0.257328614 | 0.952431781 | 0.270180626 | Purifying selection |
| <i>LcWRKY7</i>  | augustus18960.t1 | <i>LcWRKY55</i> | augustus13809.t1 | 0.153953378 | 0.908176474 | 0.169519232 | Purifying selection |
| <i>LcWRKY73</i> | augustus62150.t1 | <i>LcWRKY74</i> | augustus24154.t1 | 0.00119024  | 0.008409338 | 0.141537924 | Purifying selection |
| <i>LcWRKY78</i> | augustus37479.t1 | <i>LcWRKY8</i>  | augustus34013.t1 | 0.315027757 | 1.180309387 | 0.266902696 | Purifying selection |
