# Supplementary figures and images for: Genome-Wide Identification and Characterization of WRKY Transcription Factors and Their Expression Profile in Loropetalum chinense var. rubrum
Source: MDPI journal article supplement (doi:10.3390/plants12112131), 2023-05-27

Motif 1

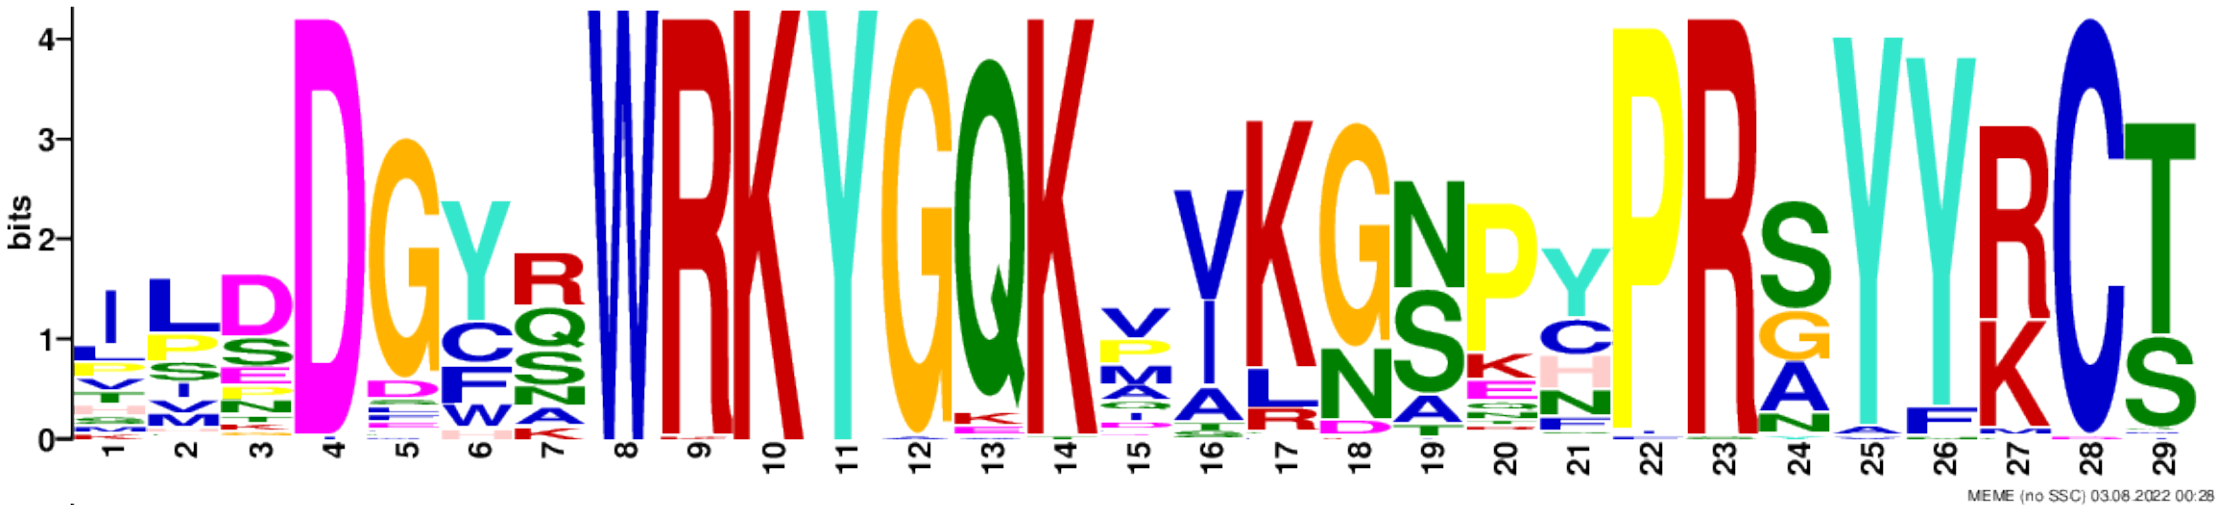

Motif 2

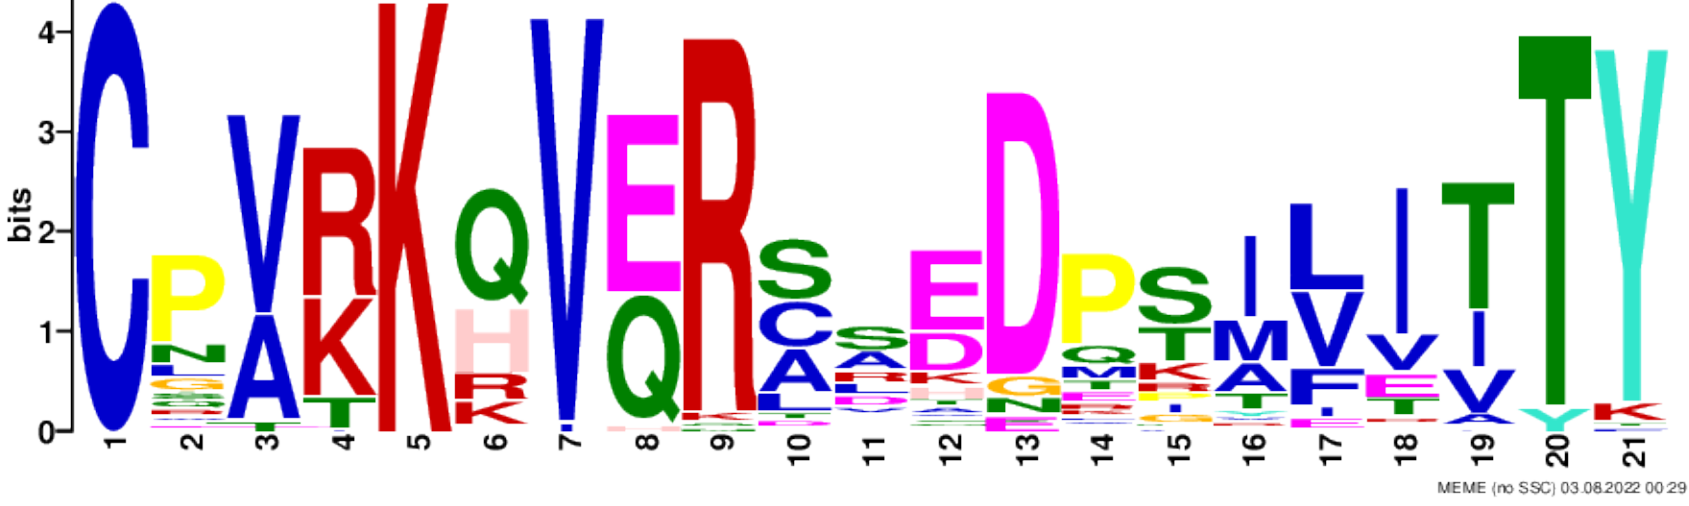

Motif 3

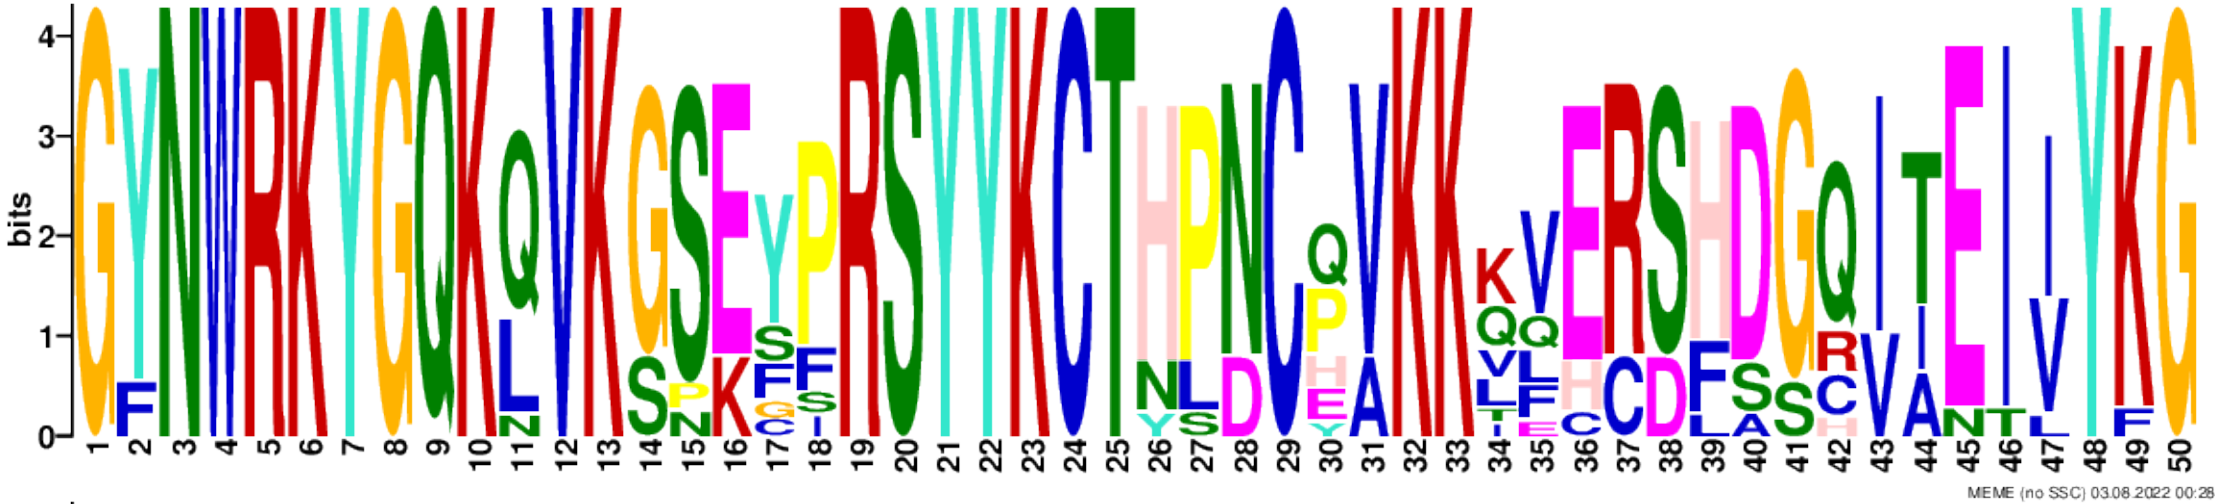

Motif 4

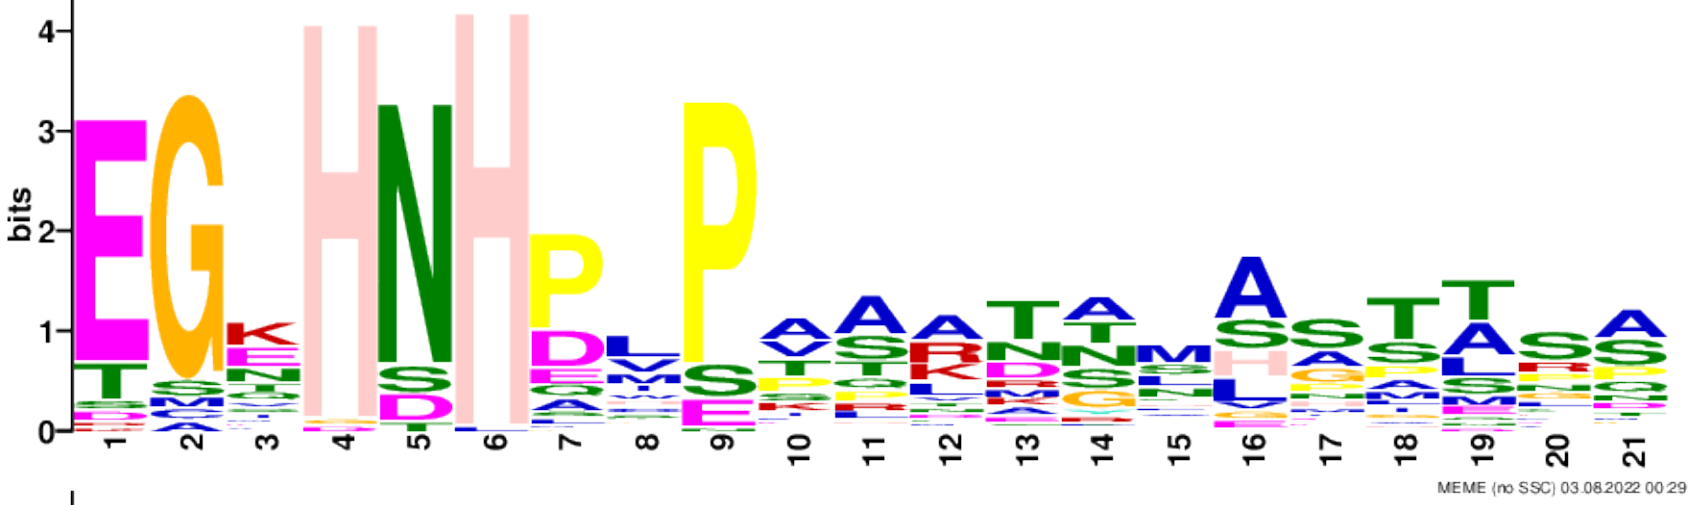

Motif 5

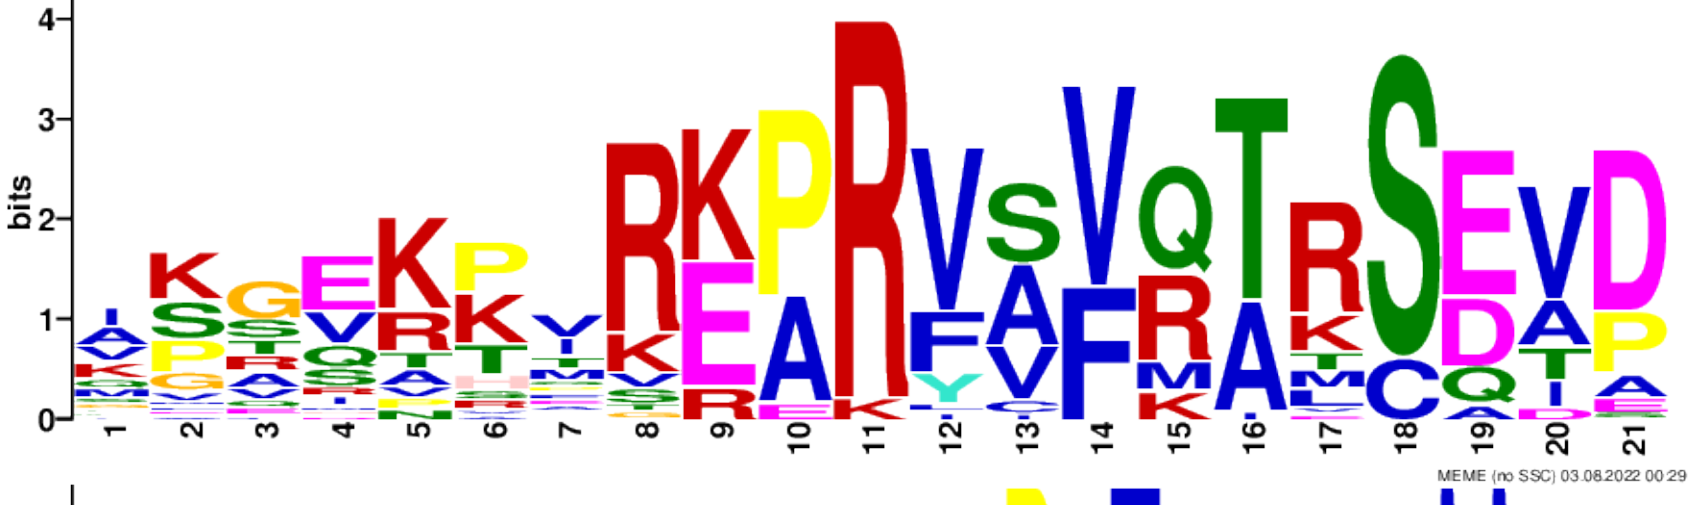

Motif 6

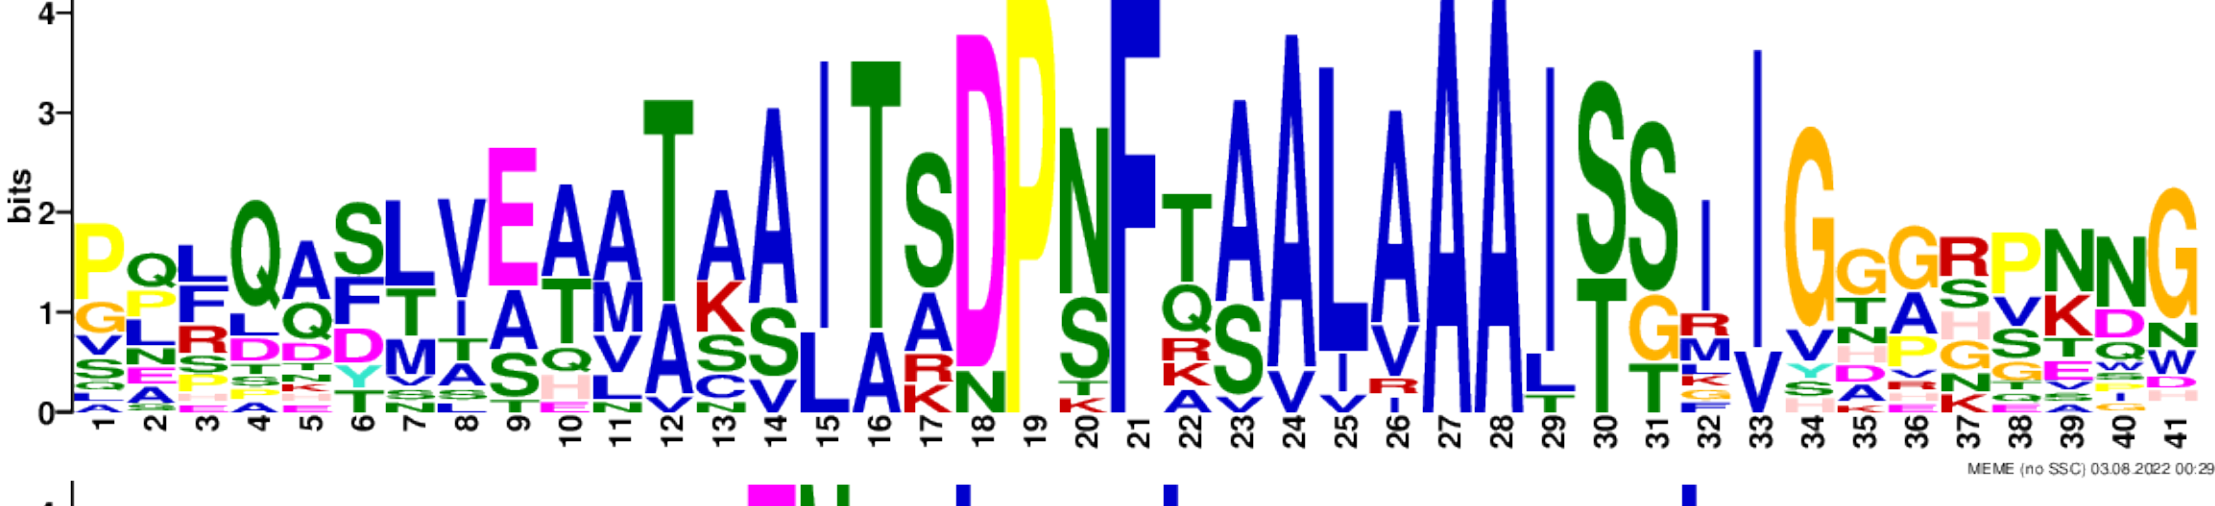

Motif 7

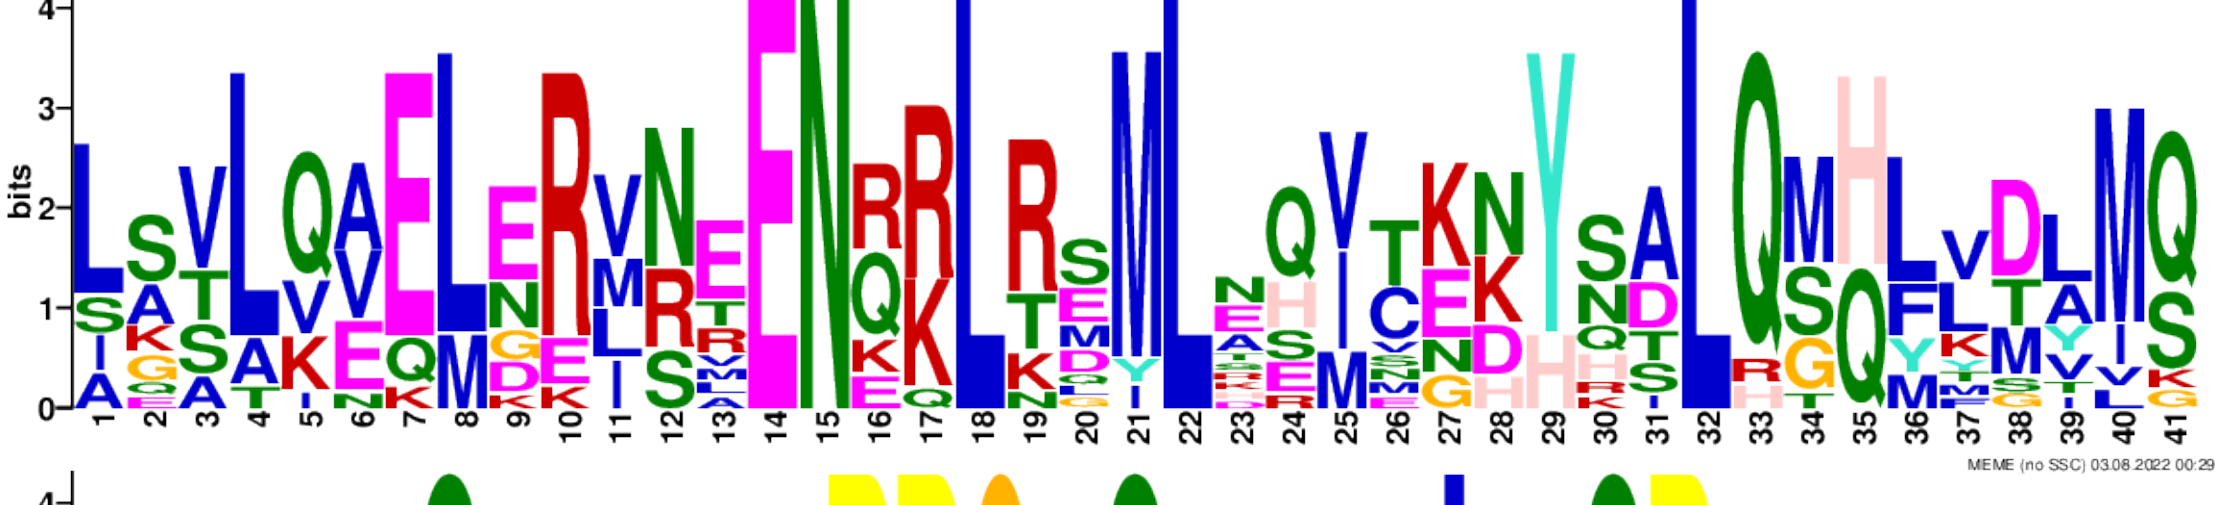

Motif 8

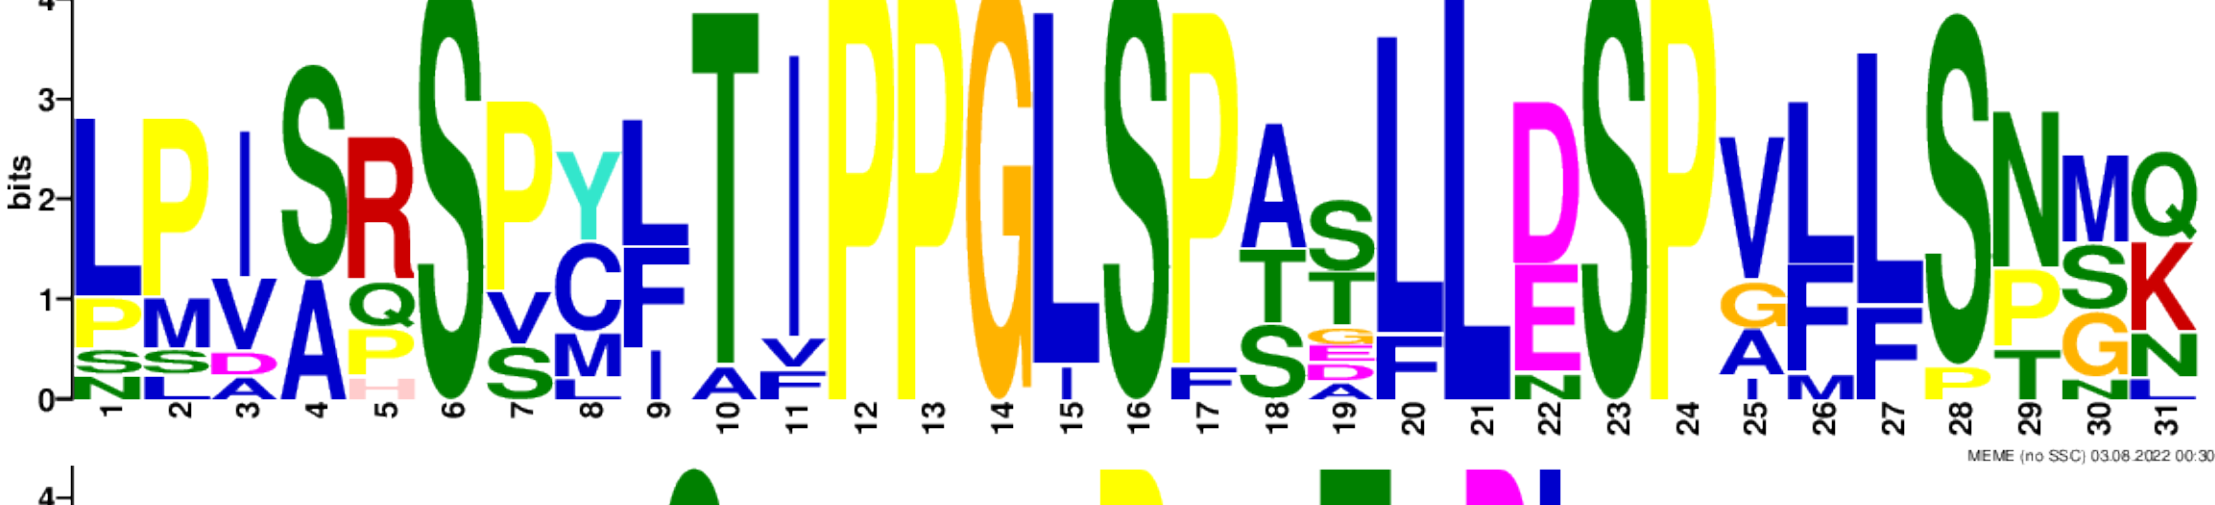

Motif 9

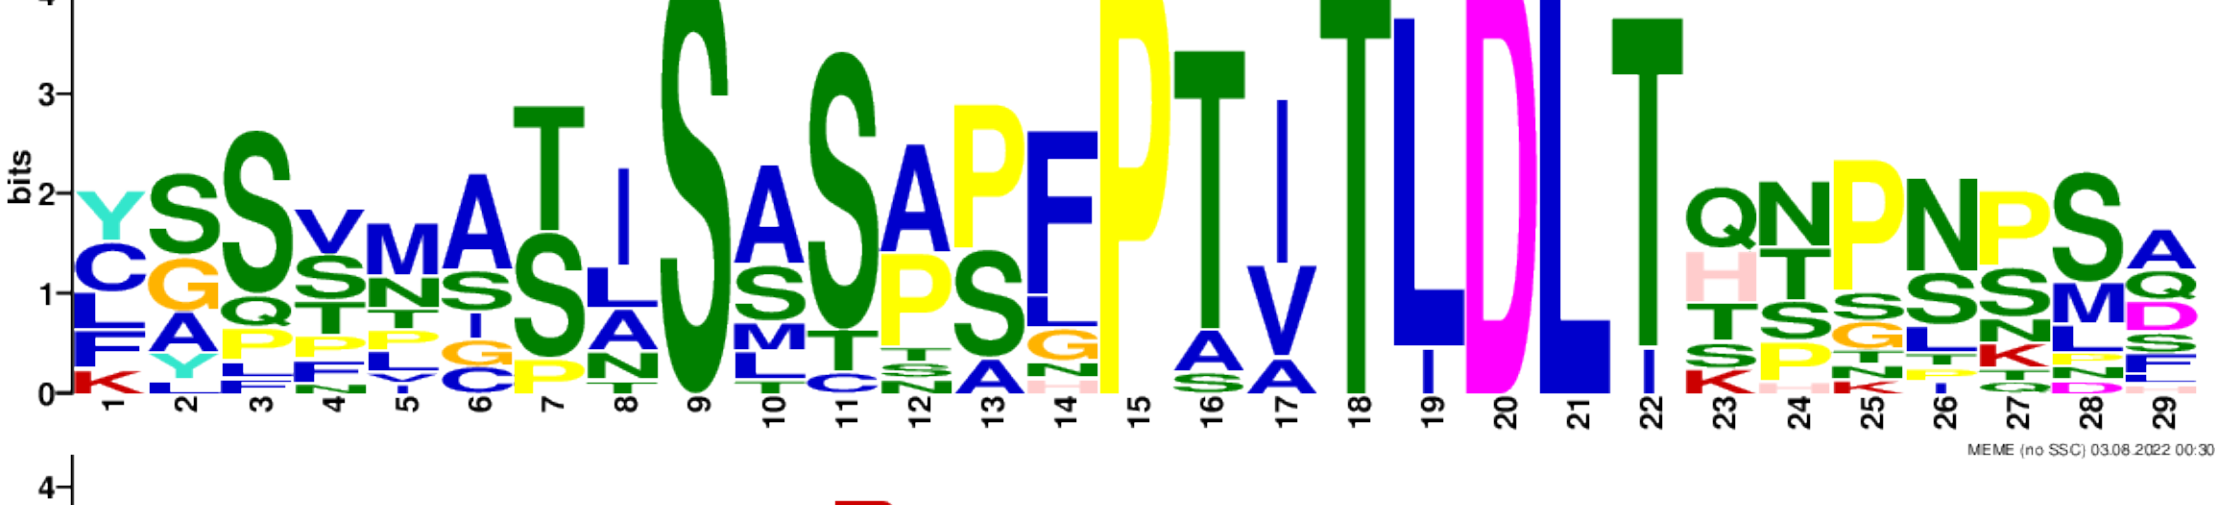

Motif 10

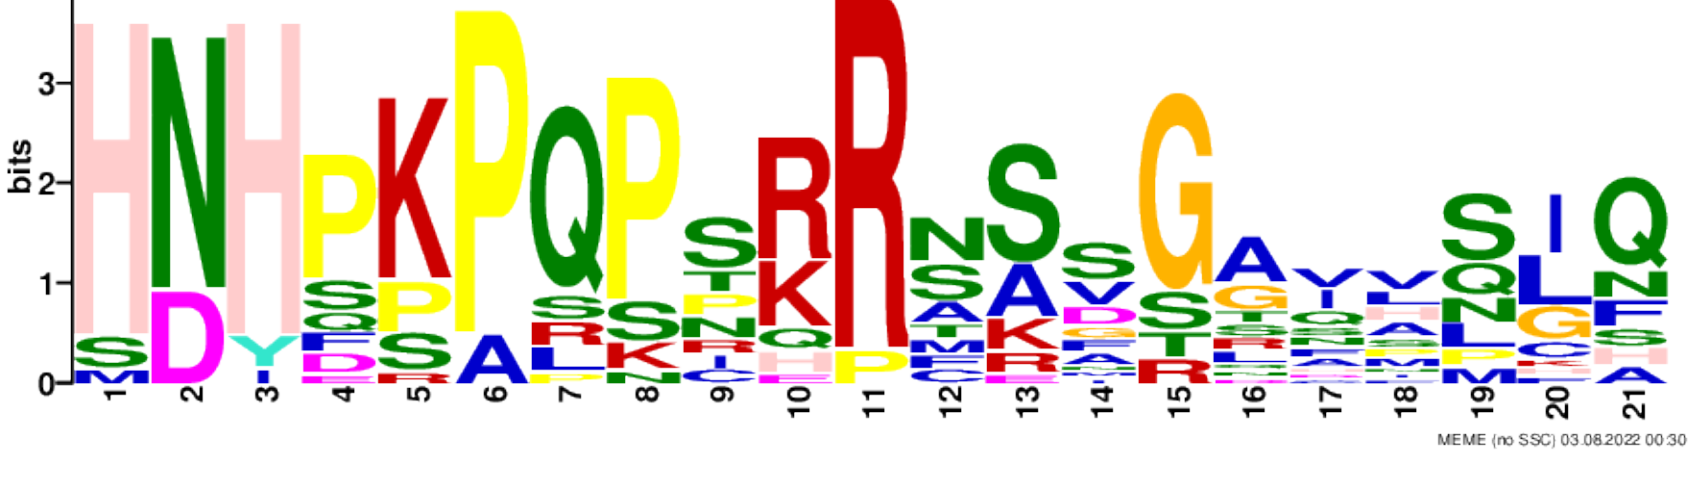

Figure S1: motif analysis results

Supplement: s1 [file s1]
